# Supplementary material
Source: publisher figshare collection journal article supplement (https://frontiersin.figshare.com/ndownloader/files/34066922)
Supplement: Supplementary file 1 [file 34066922]

**TABLE S1 |** Frequency and intensity of occurrence of *Chelonibia testudinaria* on loggerhead and green sea turtles from the Indo-Pacific region based on literature review. Note no standard deviation (SD) of the mean intensity of occurrence in Kyushu, Japan and Queensland, Australia because those literatures did not provided SD values.

|  | Location | Frequency of occurrence | Intensity of occurrence (mean ± SD) | References |
| --- | --- | --- | --- | --- |
| Loggerhead  sea turtles | Kyushu, Japan | No data available | 6.4  (597 barnacles/94 turtles) | Matsuura and Nakamura, 1993 |
| Natal, South Africa | 18% (juvenile) | No data available | Hughes, 1974 |
| 21.4 % (sub adult) |
| 47% (adult) |
| Tongaland, South Africa | 73% | No data available |
| Queensland, Australia | No data available | 1.9  (78 barnacles/41 turtle) | Doell et al., 2017 |
| Green sea turtles | Okinawa, Japan | 67% | 8.4±11.3 | Hayashi and Tsuji, 2008 |
| North Borneo (Mabul Island) | 58% (juvenile) | 6.9 ± 9.3 | Lim et al., 2021 |
| 54% (sub adult) | 14.5 ± 14.8 |
| 56% (adult male) | 12.4 ± 14.4 |
| 52.9% (adult female) | 43.4 ± 67 |
| Queensland, Australia | 52.9% | 2.6 ± 5.6 | Limpus  et al., 1994 |
| Aldabra Atoll, Seychelles | 88% | No data available | Frazier, 1971 |
